# Supplementary material for: Screening of stable resistant accessions and identification of resistance loci to Barley yellow mosaic virus disease
Source: PeerJ. 2022 Mar 17;10:e13128. doi: 10.7717/peerj.13128 (PMC8934529; doi:10.7717/peerj.13128)
Supplement: Supplemental Information 2 — The physical positions of markers associated to rym3/Undesigned had large differences. According to the references, the gene is located in chromosome 5HS, so the physical positions of cMWG770, MWG526 and MWG596 are used as candidate intervals. The red font indicates that the correlation is significant at the 0.01 level (2-tailed). [file peerj-10-13128-s002.xlsx]

## Sheet: Sheet1
Table S2 Information of markers associated with 22 known barley yellow mosaic disease-resistant genes and association analysis in the 181 barley accessions.
Chr	Gene Name	Main positioning materials (R resistant parents×S susceptible parents, group type (group size))	Mapping strategy	Progress of gene mapping	Markers associated to the gene	Center physical location of front and rear primers/bp	Amplification product size/bp	Sequence information		Type	Association analysis between population phenotype and genotype		Polymorphism in population	Reference
								Forward primer	Reverse primer		In Yangzhou	In Yancheng
1H	rym7	HHOR3365(R)×Igri(S), DH(n=53)	Marker typing, linkage mapping	2013, fine-mapping	1H-1006	261251802	150	TTTGCAGCACGGGGGTAGATT	AGGAACGCAGACAAGCATCT	Indel	0.21	0.37	polymorphism	Yang P, Perovic D, Habekuß A, et al (2013)
					Bmag347	164482405	107	CTGGGATTGGATCACTCTAA	AAAACAAGTACTGAAAATAGGAGA	SSR	-0.12	-0.22	polymorphism
2H	Rym16HB	Borwina(s)×HB(R), F5(n=55), F6(n=80)		2015, fine-mapping	ABC153	632484688	330	GCCTCTGCCGCTGGAACTAC	AAACACCTCCTGGCTCTCAG	STS	NA	NA	NA	Ruge-Wehling B, Linz A, Habekuß A, Wehling P (2006)
					MWG949	664042544	180	CGGCTGGTAAATGAACTGAA	GGCTTCCGCTACTACGTCTT		0.02	-0.05	polymorphism
3H	Rym17	Daisen-gold(S)×PK23-2(R), F2(n=106), DH(n=61)	linkage mapping，QTL mapping	2012, QTLfine-mapping	EBmac0705	16839651	150	GTGGAAAACTGAGTGAAACTC	TTGAGGAGAAGTAATGACGAT	SSR	0.14	0.02	polymorphism	Kai H, Takata K, Tsukazaki M, et al (2012)
	rym4/5/6/10/HOR3298/HOR4224	Igri(S)×Franka(R, rym4), RIL(n=45); Alraune(S)× W122.37-1(R, rym5), RIL(n=85)	Chromosome walking	2005, cloned. Updated in 2019	QLB1	612473728	~160	CCAAGAACAACACAAGGGAAA	CCCAACAACTTGTGCCTAAAA		0.4	0.36	polymorphism	Stein N, Perovic D, Kumlehn J, et al (2005)
4H	rym1/11	W757/112(R)×W757/982(S), DH(n=191); W757/924(S)×W757/612(R), DH(n=161)		2014, cloned	MWG2134	475920080	258	GCAACTCAACGCCATTCCAT	CCAGCGTCTTTTCATGGGTA	STS	NA	NA	NA	Stein N, Perovic D, Kumlehn J, et al (2005)
	rym18	Daisen-gold(S)×PK23-2(R), F2(n=106), DH(n=61)	linkage mapping，QTL mapping	2012, QTL fine-mapping	MWG948	476257793	283	GCATTCCGTTTGGACTATGG	CGTCGCCGATATTTGTAAGC		0.06	0.08	polymorphism	Kai H, Takata K, Tsukazaki M, et al (2012)
					Bmag0490	503206569	121	TGATACATCAAGATCGTGACA	GGGACTGAGTGTATGAATGAG	SSR	-0.09	0.02	polymorphism	Bauer E, Weyen J, Schiemann A, et al (1997)
	rym8	10247(R)×Trixi(S), F2(n=108)	Marker typing, linkage mapping	1997, preliminary mapping	MWG2307	600584178	382	AGACCACGATCTTCCGTCGG	TGCATACATGCTCTGACTTGC		NA	NA	NA	Bauer E, Weyen J, Schiemann A, et al (1997)
	rym9	Bulgarian347(R)×1132(S), F2(n=63)		1993, preliminary mapping	MWG2037b	600946059	250	GCCTTGGATGCCATTGCTTA	CATTCCTCTACCGAACTGAA		0.35	0.19	polymorphism	Werner. K, Pellio. B, Ordon F, et al (1997)
		Bulgarian347(R)×Alraune(S), F2(n=63)		2000, preliminary mapping	HVM67	601544106	116	GTCGGGCTCCATTGCTCT	CCGGTACCCAGTGACGAC		-0.01	0.02	polymorphism	Humbroich (2007)
	rym12	Muju covered 2(R)×Spirit(S), DH(n=151)		2005, preliminary mapping
	rym13	Taihoku A(R)×Plaisant(S), DH(n=154)		2003, preliminary mapping	Ebmac0788	580928446	168	TAACTTACTTTATATCCATGGCA	ATGATGAGAACTCTTCACCC		-0.09	0.03	polymorphism	Werner K, Rönicke S, Le Gouis J, et al (2003b)
5H	rym3/Undesigned	Ishuku Shirazu(R)×Ko A(S), F2(n=153)	Marker typing, linkage mapping	2003, preliminary mapping	ABG705	19349639	~500	CTAGAGTGCCTAGAAGATTG	TTACTTAGAAAACCGATGAA	STS	-0.01	-0.04	polymorphism	Werner K, Friedt W, Laubach E, et al (2003a)
					MWG2040B	76519820	319	GATGAGATGTGACTTCGACA	CTTCACAACATGCCTAAGAT		-0.05	-0.05	polymorphism
					cMWG770	399617508	195	CATTCGGACAGCCCAGCTCA	GGCTATGGAGGGTGGGGGTT		0.04	-0.03	polymorphism
					MWG526	536780216	279	GAGTGGCTCATCGTATTGCACTCC	GGTACTCTGCTTTCAGAGGTATTTGA		-0.17	-0.19	polymorphism
					MWG596	362225276	306	GTGGAGTCAGCCAGGTTTCCGTATCT	ACAGATGGAAATATAACCCCTATAG		-0.03	-0.03	polymorphism
6H	Rym14HB	Borwina(s)×HB(R), F5(n=236), F6(n=168)		2020, fine-mapping	Xiac501	8567009	750	GGATCGCCGGCAACCTCAACA	CCGGCAGGAAACGCTTCTGGA	SSR	-0.02	0.04	polymorphism	Pidon H, Wendler N, Habekuβ A, et al (2020)
					MWG573	104865912	240	CTGCACTCATGTCAGCAAGA	GACCAACGGGAGATGCTCGT		0.12	-0.03	polymorphism
	rym15	Chikurin Ibaraki(R)×Plaisant(S), DH(n=217)		2004, preliminary mapping	Bmag0173	90550409	150	CATTTTTGTTGGTGACGG	ATAATGGCGGGAGAGACA		-0.03	-0.01	polymorphism	Le Gouis J, Devaux P, Werner K, et al (2004)
					Ebmac0874	78267384	~180	AACCATTCCTCACCCAGG	GTGAATGATGTTGAGGACATTG		0.03	0.01	polymorphism
7H	rym2/rym7t	Mihori Hadaka 3		1993, /2012, preliminary mapping	Bmac0031	213756479	175	AGAGAAAGAGAAATGTCACCA	ATACATCCATGTGAGGGC		0.1	0.12	polymorphism	Takata K, Kai H, Uchimura Y, et al (2012)
					Bamc0167	369841451	~180	CATTTCCACTTCAAAATATCC	CCAAAGTTTGAGTGCAGAC		0.02	-0.03	polymorphism
The physical positions of markers associated to rym3/Undesigned had large differences. According to the references, the gene is located in chromosome 5HS, so the physical positions of cMWG770, MWG526 and MWG596 are used as candidate intervals.
The red font indicates that the correlation is significant at the 0.01 level (2-tailed).
