# Supplementary material for: Screening of stable resistant accessions and identification of resistance loci to Barley yellow mosaic virus disease
Source: PeerJ. 2022 Mar 17;10:e13128. doi: 10.7717/peerj.13128 (PMC8934529; doi:10.7717/peerj.13128)
Supplement: Supplemental Information 3 [file peerj-10-13128-s003.xlsx]

## Sheet: Sheet1
Table S3 Distribution of markers used in GWAS analysis on barley chromosomes
Chr	Chromosome length (bp)	Number of markers	Average marker density (Mb)
1H	516505932	386	1.3381
2H	665585731	722	0.921864
3H	621516506	567	1.09615
4H	610333535	445	1.37154
5H	588218686	596	0.986944
6H	561794515	430	1.3065
7H	632540561	693	0.912757
Total	4196495466	3839	1.09312
