# Supplementary material for: Screening of stable resistant accessions and identification of resistance loci to Barley yellow mosaic virus disease
Source: PeerJ. 2022 Mar 17;10:e13128. doi: 10.7717/peerj.13128 (PMC8934529; doi:10.7717/peerj.13128)
Supplement: Supplemental Information 5 [file peerj-10-13128-s005.xlsx]

## Sheet: Sheet1
Table S5 Sequence information and purposes of PCR primers used in this study.
Primer name	Primer sequence (5'→3')	Established Tm (℃)	Product size (bp)	Purposes	References
HvACTIN-F	GTGTGATGTGGATATCAGGAAGG	58	277	Endogenous control for cDNA synthesis	Zou et al., 2016; Shi et al., 2019
HvACTIN-R	TTAGAAGCACTTCCGGTGGA
BaYMV-CP-f2	GCAGATGGTAACTGGAGCGTG	58	648	Detecte the presence of BaYMV
BaYMV-CP-r	TTAGGTTAGTTCTGGGTGTCCATC
BaMMV-RESK-58	GATTGCATACTCAGGTGGAGAG	58	940	Detecte the presence of BaMMV
BaMMV-VPg-rev	CTGTATGTGCGCAGGAGCTAT
BaMMV1-4F	GTTCAAAGAGCGCAGCACAAG	59	880	Amplication and sequencing of the BaYMV-VPg segment	Dr Ping Yang, private communication
BaYMV-VPg-R	TGAGTGCATCAGTTGTGGTTTG
BaMMV-VPg-F	AGAGCAAGAATTCACTCACTGC	58	830	Amplication and sequencing of the BaMMV-VPg segment
BaMMV-VPg-R	GCAGGAGCTATGATCCAATCG
