# Supplementary material for: Screening of stable resistant accessions and identification of resistance loci to Barley yellow mosaic virus disease
Source: PeerJ. 2022 Mar 17;10:e13128. doi: 10.7717/peerj.13128 (PMC8934529; doi:10.7717/peerj.13128)
Supplement: Supplemental Information 7 — Green highlights represent plant disease resistance genes. Yellow highlights represent significant association loci. [file peerj-10-13128-s007.xlsx]

## Sheet: Sheet1
Table S7 Candidate genes annotated in the confidence intervals of three novel BaYMV disease resistance loci.
Chr	Start position	Gene ID or loci	Strand	Type	Annotation	Potential disease resistance genes
6H	556875138	HORVU.MOREX.r3.6HG0631490	+	protein_coding	Zinc finger family protein
6H	556883868	HORVU.MOREX.r3.6HG0631500	+	transposon_related	Retrovirus-related Pol polyprotein from transposon TNT 1-94
6H	556887867	HORVU.MOREX.r3.6HG0631510	+	transposon_related	Retrovirus-related Pol polyprotein from transposon TNT 1-94
6H	556905669	HORVU.MOREX.r3.6HG0631520	-	protein_coding	Werner Syndrome-like exonuclease
6H	556908303	HORVU.MOREX.r3.6HG0631530	-	protein_coding	LINE-1 reverse transcriptase
6H	556927945	HORVU.MOREX.r3.6HG0631540	-	transposon_related	Retrotransposon protein, putative, unclassified, expressed
6H	556930089	HORVU.MOREX.r3.6HG0631550	-	protein_coding	Gag polyprotein
6H	556933324	HORVU.MOREX.r3.6HG0631560	-	protein_coding	Serine/threonine-protein phosphatase
6H	556964005	HORVU.MOREX.r3.6HG0631570	+	protein_coding	Succinate--CoA ligase [ADP-forming] subunit beta
6H	556967537	HORVU.MOREX.r3.6HG0631580	-	protein_coding	Protein SMG8
6H	556972423	HORVU.MOREX.r3.6HG0631590	-	transposon_related	Retrotransposon protein, putative, unclassified
6H	556973529	HORVU.MOREX.r3.6HG0631600	-	protein_coding	Rop guanine nucleotide exchange factor, putative
6H	556981503	HORVU.MOREX.r3.6HG0631610	+	transposon_related	Transposon protein, putative, Mutator sub-class
6H	556983177	HORVU.MOREX.r3.6HG0631620	+	transposon_related	Transposon protein, putative, Mutator sub-class
6H	557033962	HORVU.MOREX.r3.6HG0631630	-	protein_coding	Smad/FHA domain protein
6H	557097550	HORVU.MOREX.r3.6HG0631640	-	protein_coding	O-methyltransferase
6H	557125100	HORVU.MOREX.r3.6HG0631650	+	protein_coding	RING/U-box superfamily protein
6H	557126718	HORVU.MOREX.r3.6HG0631660	-	protein_coding	RING/U-box superfamily protein
6H	557170556	HORVU.MOREX.r3.6HG0631670	-	non_coding	Photosystem II D2 protein
6H	557173524	HORVU.MOREX.r3.6HG0631680	-	protein_coding	Lysine-specific histone demethylase 1-3-like protein
6H	557287471	HORVU.MOREX.r3.6HG0631690	-	protein_coding	RNA-directed DNA polymerase (reverse transcriptase)-related family protein
6H	557290843	HORVU.MOREX.r3.6HG0631700	+	protein_coding	Aquaporin
6H	557308688	HORVU.MOREX.r3.6HG0631710	-	protein_coding	Aquaporin
6H	557311389	HORVU.MOREX.r3.6HG0631720	-	protein_coding	Protein kinase superfamily protein
6H	557345046	HORVU.MOREX.r3.6HG0631730	+	protein_coding	Peptidyl-prolyl cis-trans isomerase
6H	557348767	HORVU.MOREX.r3.6HG0631740	+	protein_coding	Pyridoxal phosphate (PLP)-dependent transferases superfamily protein
6H	557354046	HORVU.MOREX.r3.6HG0631750	+	protein_coding	Membrane protein insertase YidC
6H	557388861	HORVU.MOREX.r3.6HG0631760	-	protein_coding	Signal peptide peptidase-like protein
6H	557398776	HORVU.MOREX.r3.6HG0631770	+	protein_coding	Acyl-CoA-binding domain-containing protein 4
6H	557398776	HORVU.MOREX.r3.6HG0631770	+	protein_coding	Acyl-CoA-binding domain-containing protein 4
6H	557404170	HORVU.MOREX.r3.6HG0631780	-	protein_coding	4-coumarate-CoA ligase-like protein
6H	557416218	HORVU.MOREX.r3.6HG0631790	+	non_coding	50S ribosomal protein L9
6H	557463228	HORVU.MOREX.r3.6HG0631800	-	transposon_related	Retrovirus-related Pol polyprotein from transposon TNT 1-94
6H	557506675	HORVU.MOREX.r3.6HG0631810	+	protein_coding	Phosphatidylinositol-4-phosphate 5-kinase, putative
6H	557513864	HORVU.MOREX.r3.6HG0631820	-	protein_coding	NAC domain protein,
6H	557513864	HORVU.MOREX.r3.6HG0631820	-	protein_coding	NAC domain protein,
6H	557546851	HORVU.MOREX.r3.6HG0631830	+	protein_coding	F-box family protein
6H	557548196	SNP5272
6H	557566277	HORVU.MOREX.r3.6HG0631840	+	protein_coding	F-box family protein, putative
6H	557583569	HORVU.MOREX.r3.6HG0631850	+	protein_coding	2-oxoglutarate-dependent ethylene/succinate-forming enzyme
6H	557584517	HORVU.MOREX.r3.6HG0631860	+	protein_coding	CAP (Cysteine-rich secretory proteins, Antigen 5, and Pathogenesis-related 1 protein) superfamily protein
6H	557612841	HORVU.MOREX.r3.6HG0631870	-	protein_coding	Receptor-like kinase
6H	557615961	HORVU.MOREX.r3.6HG0631880	-	protein_coding	NSP-interacting kinase-like protein
6H	557617540	HORVU.MOREX.r3.6HG0631890	-	protein_coding	Leucine-rich repeat receptor-like kinase	LRR ✔
6H	557641699	HORVU.MOREX.r3.6HG0631900	-	protein_coding	F-box family protein
6H	557647377	HORVU.MOREX.r3.6HG0631910	+	protein_coding	Hepatocellular carcinoma-associated antigen 59 family protein, expressed
6H	557647706	SNP3442
6H	557650292	SNP0166
6H	557650461	HORVU.MOREX.r3.6HG0631920	+	protein_coding	nudix hydrolase homolog 11
6H	557652696	HORVU.MOREX.r3.6HG0631930	-	protein_coding	GTP-binding protein 8
6H	557658700	HORVU.MOREX.r3.6HG0631940	-	protein_coding	TCP-1/cpn60 chaperonin family protein
6H	557663381	HORVU.MOREX.r3.6HG0631950	+	protein_coding	Disease resistance protein (TIR-NBS-LRR class) family	NBS-LRR ✔
6H	557673636	HORVU.MOREX.r3.6HG0631960	+	protein_coding	Serine/threonine protein phosphatase 7 long form isogeny
6H	557674921	HORVU.MOREX.r3.6HG0631970	+	protein_coding	Serine/threonine protein phosphatase 7 long form isogeny
6H	557676949	HORVU.MOREX.r3.6HG0631980	-	protein_coding	Protein kinase C-binding protein NELL2
6H	557677528	HORVU.MOREX.r3.6HG0631990	+	protein_coding	kinase superfamily with octicosapeptide/Phox/Bem1p domain-containing protein
6H	557729314	HORVU.MOREX.r3.6HG0632000	-	protein_coding	Xyloglucan endotransglucosylase/hydrolase
6H	557731483	HORVU.MOREX.r3.6HG0632010	+	protein_coding	cellulose-synthase like D2
6H	557732058	HORVU.MOREX.r3.6HG0632020	+	plastid_related	High-light-induced protein, chloroplastic
6H	557732058	HORVU.MOREX.r3.6HG0632020	+	plastid_related	Photosystem II 22 kDa, chloroplastic
6H	557739469	HORVU.MOREX.r3.6HG0632030	+	protein_coding	M-1
6H	557742667	HORVU.MOREX.r3.6HG0632040	-	protein_coding	LINE-1 reverse transcriptase
6H	557753496	HORVU.MOREX.r3.6HG0632050	-	protein_coding	Rab9 effector protein with kelch motifs
6H	557755817	HORVU.MOREX.r3.6HG0632060	-	protein_coding	Receptor lectin kinase
6H	557758216	HORVU.MOREX.r3.6HG0632070	+	protein_coding	Receptor-like protein kinase
6H	557762434	HORVU.MOREX.r3.6HG0632080	-	protein_coding	ATP-dependent RNA helicase
6H	557767504	HORVU.MOREX.r3.6HG0632090	+	protein_coding	UDP-D-glucuronate 4-epimerase 6
6H	557770542	HORVU.MOREX.r3.6HG0632100	+	protein_coding	GTPase-activating protein and VPS9 domain-containing protein 1
6H	557771117	SNP2571
6H	557773116	HORVU.MOREX.r3.6HG0632110	+	protein_coding	CLAVATA3/ESR (CLE)-related protein 25
6H	557776137	HORVU.MOREX.r3.6HG0632120	+	transposon_related	Transposon protein, putative, CACTA, En/Spm sub-class
6H	557777125	HORVU.MOREX.r3.6HG0632130	-	protein_coding	calcium-dependent lipid-binding family protein
6H	557777832	HORVU.MOREX.r3.6HG0632140	-	protein_coding	RNA-binding region RNP-1
6H	557779503	HORVU.MOREX.r3.6HG0632150	-	protein_coding	Transcription elongation factor (TFIIS) family protein
6H	557780387	HORVU.MOREX.r3.6HG0632160	+	protein_coding	Zinc finger and BTB domain-containing protein 20
6H	557817072	HORVU.MOREX.r3.6HG0632170	+	protein_coding	Titan9
6H	557821392	HORVU.MOREX.r3.6HG0632180	+	protein_coding	BRI1 suppressor 1 (BSU1)-like 1
6H	557830744	HORVU.MOREX.r3.6HG0632190	-	protein_coding	RNA-directed DNA polymerase (reverse transcriptase)-related family protein
6H	557836228	HORVU.MOREX.r3.6HG0632200	+	protein_coding	YELLOW STRIPE like 3
6H	557838337	HORVU.MOREX.r3.6HG0632210	-	protein_coding	Electron transfer flavoprotein beta-subunit
6H	557844161	HORVU.MOREX.r3.6HG0632220	+	transposon_related	Transposon protein, putative, CACTA, En/Spm sub-class
6H	557855572	HORVU.MOREX.r3.6HG0632230	+	protein_coding	Serine/threonine protein phosphatase 7 long form isogeny
6H	557856744	HORVU.MOREX.r3.6HG0632240	+	protein_coding	D-alanine--poly(phosphoribitol) ligase subunit 2
6H	557859543	HORVU.MOREX.r3.6HG0632250	-	transposon_related	Transposon protein, putative, Mutator sub-class, expressed
6H	558002031	HORVU.MOREX.r3.6HG0632260	-	protein_coding	Protocadherin-like wing polarity protein stan
6H	558006524	HORVU.MOREX.r3.6HG0632270	-	protein_coding	Leucine-rich repeat family protein
6H	558008662	HORVU.MOREX.r3.6HG0632280	-	protein_coding	Protein GrpE
6H	558009150	HORVU.MOREX.r3.6HG0632290	-	protein_coding	S-locus-related I
6H	558009765	HORVU.MOREX.r3.6HG0632300	-	transposon_related	Retrotransposon protein, putative, unclassified
6H	558011943	HORVU.MOREX.r3.6HG0632310	-	protein_coding	Endonuclease/exonuclease/phosphatase family protein
6H	558013670	HORVU.MOREX.r3.6HG0632320	-	protein_coding	Leucine-rich repeat protein	LRR ✔
6H	558036136	HORVU.MOREX.r3.6HG0632330	+	protein_coding	pre-mRNA-splicing factor of RES complex protein
6H	558041218	HORVU.MOREX.r3.6HG0632340	+	protein_coding	P-loop containing nucleoside triphosphate hydrolases superfamily protein
6H	558046190	HORVU.MOREX.r3.6HG0632350	-	protein_coding	LEM3 (Ligand-effect modulator 3) family protein
6H	558067069	HORVU.MOREX.r3.6HG0632360	+	protein_coding	Prolyl 4-hydroxylase alpha subunit, putative
6H	558072645	HORVU.MOREX.r3.6HG0632370	+	protein_coding	Sucrose transporter
6H	558084201	HORVU.MOREX.r3.6HG0632380	+	protein_coding	Splicing factor 3B subunit 2
6H	558105443	HORVU.MOREX.r3.6HG0632390	-	protein_coding	NBS-LRR disease resistance protein-like protein	NBS-LRR ✔
6H	558116401	HORVU.MOREX.r3.6HG0632400	+	protein_coding	Disease resistance protein (NBS-LRR class) family	NBS-LRR ✔
6H	558124627	HORVU.MOREX.r3.6HG0632410	+	protein_coding	Amino acid transporter family protein
6H	558126991	HORVU.MOREX.r3.6HG0632420	+	protein_coding	Glutathione-regulated potassium-efflux system protein KefB
6H	558129665	HORVU.MOREX.r3.6HG0632430	+	protein_coding	NBS-LRR disease resistance protein-like protein	NBS-LRR ✔
6H	558131128	HORVU.MOREX.r3.6HG0632440	+	protein_coding	Disease resistance protein RPM1	R ✔
6H	558132575	HORVU.MOREX.r3.6HG0632450	-	transposon_related	Retrotransposon protein, putative, unclassified
6H	558386631	HORVU.MOREX.r3.6HG0632460	+	protein_coding	Werner Syndrome-like exonuclease
6H	558429630	HORVU.MOREX.r3.6HG0632470	+	protein_coding	Protein kinase family protein
6H	558440474	HORVU.MOREX.r3.6HG0632480	+	protein_coding	Disease resistance protein RPM1	RPM1 ✔
6H	558441519	SNP4191
6H	558448654	HORVU.MOREX.r3.6HG0632490	+	protein_coding	Disease resistance protein RPM1	RPM1 ✔
6H	558471101	HORVU.MOREX.r3.6HG0632500	+	protein_coding	NA
6H	558472103	HORVU.MOREX.r3.6HG0632510	+	protein_coding	Werner Syndrome-like exonuclease
6H	558510330	HORVU.MOREX.r3.6HG0632520	+	protein_coding	Protein kinase family protein
6H	558524904	HORVU.MOREX.r3.6HG0632530	+	protein_coding	Disease resistance protein RPM1	RPM1 ✔
6H	558533084	HORVU.MOREX.r3.6HG0632540	-	protein_coding	alpha/beta-Hydrolases superfamily protein
6H	558556695	HORVU.MOREX.r3.6HG0632550	+	protein_coding	disease resistance family protein / LRR family protein	RPM1 ✔
6H	558562698	HORVU.MOREX.r3.6HG0632560	-	transposon_related	Retrotransposon protein, putative, Ty1-copia subclass
6H	558572949	HORVU.MOREX.r3.6HG0632570	+	protein_coding	FBD-associated F-box protein
6H	558573580	SNP2172
6H	558573610	SNP2173
6H	558577583	HORVU.MOREX.r3.6HG0632580	+	protein_coding	Ubiquitin carboxyl-terminal hydrolase-related protein
6H	558578272	HORVU.MOREX.r3.6HG0632590	+	protein_coding	BED zinc finger,hAT family dimerization domain
6H	558579100	HORVU.MOREX.r3.6HG0632600	+	protein_coding	BED zinc finger,hAT family dimerization domain
6H	558628769	HORVU.MOREX.r3.6HG0632610	+	protein_coding	Disease resistance protein RPM1	RPM1 ✔
6H	558631311	HORVU.MOREX.r3.6HG0632620	-	transposon_related	Retrovirus-related Pol polyprotein from transposon TNT 1-94
6H	558638856	HORVU.MOREX.r3.6HG0632630	+	protein_coding	NBS-LRR-like resistance protein	NBS-LRR ✔
6H	558642038	HORVU.MOREX.r3.6HG0632640	-	protein_coding	GATA transcription factor, putative
6H	558643470	HORVU.MOREX.r3.6HG0632650	+	protein_coding	Disease resistance protein RPM1	RPM1 ✔
6H	558658036	HORVU.MOREX.r3.6HG0632660	-	protein_coding	Testis-expressed sequence 2 protein
5H	39430585	HORVU.MOREX.r3.5HG0432660	+	protein_coding	NA
5H	39431601	HORVU.MOREX.r3.5HG0432670	+	protein_coding	Werner Syndrome-like exonuclease
5H	39748245	HORVU.MOREX.r3.5HG0432680	-	protein_coding	Retrovirus-related Pol polyprotein LINE-1
5H	39780862	HORVU.MOREX.r3.5HG0432690	+	protein_coding	Enhancer of polycomb-like transcription factor protein
5H	39784214	HORVU.MOREX.r3.5HG0432700	-	plastid_related	ATP synthase subunit a, chloroplastic
5H	39828666	HORVU.MOREX.r3.5HG0432710	+	transposon_related	Transposon protein, putative, CACTA, En/Spm sub-class
5H	39874369	HORVU.MOREX.r3.5HG0432720	+	protein_coding	Piezo-type mechanosensitive ion channel-like protein
5H	39930752	HORVU.MOREX.r3.5HG0432730	+	non_coding	Cytochrome c oxidase subunit 1
5H	39936510	HORVU.MOREX.r3.5HG0432740	+	protein_coding	Protein transport protein Sec61 subunit alpha
5H	40017922	HORVU.MOREX.r3.5HG0432750	+	protein_coding	TTF-type zinc finger protein with HAT dimerization domain-containing protein
5H	40044179	HORVU.MOREX.r3.5HG0432760	+	protein_coding	Multidrug resistance protein ABC transporter family protein
5H	40054608	HORVU.MOREX.r3.5HG0432770	-	transposon_related	Retrotransposon protein, putative, Ty1-copia subclass
5H	40078319	HORVU.MOREX.r3.5HG0432780	+	protein_coding	OSBP(oxysterol binding protein)-related protein 2B
5H	40127466	HORVU.MOREX.r3.5HG0432790	-	protein_coding	Argininosuccinate synthase
5H	40172715	HORVU.MOREX.r3.5HG0432800	-	protein_coding	plant glycogenin-like starch initiation protein 1
5H	40175693	HORVU.MOREX.r3.5HG0432810	-	protein_coding	Glutamate-1-semialdehyde 2,1-aminomutase
5H	40253819	HORVU.MOREX.r3.5HG0432820	+	protein_coding	Eukaryotic aspartyl protease family protein, putative
5H	40254353	SNP1728
5H	40254383	SNP1729
5H	40254413	SNP1730
5H	40260076	HORVU.MOREX.r3.5HG0432830	+	protein_coding	DEAD box ATP-dependent RNA helicase
5H	40265162	SNP4036
5H	40308941	HORVU.MOREX.r3.5HG0432840	+	protein_coding	Nascent polypeptide-associated complex subunit beta
5H	40437854	HORVU.MOREX.r3.5HG0432850	+	protein_coding	protein kinase family protein
5H	40449284	HORVU.MOREX.r3.5HG0432860	-	protein_coding	DNA glycosylase superfamily protein
5H	40452930	HORVU.MOREX.r3.5HG0432870	+	protein_coding	Mitochondrial metalloendopeptidase OMA1
5H	40615752	HORVU.MOREX.r3.5HG0432880	-	protein_coding	Pyridoxal kinase PdxY
7H	17711266	HORVU.MOREX.r3.7HG0644150	+	protein_coding	GDSL esterase/lipase
7H	17712516	HORVU.MOREX.r3.7HG0644160	+	protein_coding	GDSL esterase/lipase
7H	17714486	HORVU.MOREX.r3.7HG0644170	+	transposon_related	Transposon protein, putative, CACTA, En/Spm sub-class
7H	17716329	HORVU.MOREX.r3.7HG0644180	+	protein_coding	TIR-NBS-LRR class disease resistance protein	NBS-LRR ✔
7H	17723584	HORVU.MOREX.r3.7HG0644190	+	protein_coding	Glucan endo-1,3-beta-glucosidase, putative
7H	17743537	HORVU.MOREX.r3.7HG0644200	-	protein_coding	Alpha/beta-hydrolase superfamily protein
7H	17751867	HORVU.MOREX.r3.7HG0644210	+	protein_coding	ubiquitin-specific protease 26
7H	17768688	HORVU.MOREX.r3.7HG0644220	-	protein_coding	Arginine decarboxylase
7H	17924561	HORVU.MOREX.r3.7HG0644230	-	protein_coding	3-ketoacyl-CoA thiolase B, peroxisomal
7H	18001128	HORVU.MOREX.r3.7HG0644240	-	protein_coding	F-box protein PP2
7H	18015718	HORVU.MOREX.r3.7HG0644250	-	protein_coding	Xyloglucan endotransglucosylase/hydrolase
7H	18025218	HORVU.MOREX.r3.7HG0644260	+	protein_coding	Cell cycle checkpoint protein RAD1
7H	18030707	HORVU.MOREX.r3.7HG0644270	+	protein_coding	F-box/FBD-like domains containing protein
7H	18079061	HORVU.MOREX.r3.7HG0644280	-	protein_coding	serine-rich adhesin for platelets-like protein
7H	18079714	HORVU.MOREX.r3.7HG0644290	-	protein_coding	Disease resistance protein (TIR-NBS-LRR class)	NBS-LRR ✔
7H	18124916	HORVU.MOREX.r3.7HG0644300	+	protein_coding	Alpha/beta-hydrolase superfamily protein
7H	18191937	HORVU.MOREX.r3.7HG0644310	-	protein_coding	Caffeoyl-CoA O-methyltransferase
7H	18237742	HORVU.MOREX.r3.7HG0644320	+	protein_coding	Methyltransferase, putative
7H	18239078	HORVU.MOREX.r3.7HG0644330	+	protein_coding	ERD (early-responsive to dehydration stress) family protein
7H	18240930	HORVU.MOREX.r3.7HG0644340	-	protein_coding	Yellow stripe-like transporter 1
7H	18291439	HORVU.MOREX.r3.7HG0644350	+	protein_coding	Lung seven transmembrane receptor family protein
7H	18337249	HORVU.MOREX.r3.7HG0644360	+	protein_coding	NAC domain-containing protein, putative
7H	18339649	SNP0769
7H	18352216	HORVU.MOREX.r3.7HG0644370	+	protein_coding	NAC domain-containing protein, putative
7H	18373739	HORVU.MOREX.r3.7HG0644380	-	protein_coding	Werner Syndrome-like exonuclease
7H	18406166	HORVU.MOREX.r3.7HG0644390	+	protein_coding	S-adenosylmethionine uptake transporter
7H	18532706	HORVU.MOREX.r3.7HG0644400	-	protein_coding	NAC domain-containing protein
7H	18533328	SNP1993
7H	18589567	SNP4947
7H	18589900	SNP0024
7H	18617489	HORVU.MOREX.r3.7HG0644410	-	protein_coding	Protein kinase superfamily protein
7H	18621375	HORVU.MOREX.r3.7HG0644420	-	protein_coding	Senescence/dehydration-associated-like protein
7H	18624117	HORVU.MOREX.r3.7HG0644430	+	protein_coding	cytochrome P450, family 82, subfamily C, polypeptide 2
7H	18649017	HORVU.MOREX.r3.7HG0644440	-	protein_coding	Cytosolic carboxypeptidase 3
7H	18651569	HORVU.MOREX.r3.7HG0644450	-	protein_coding	WD40 repeat-like protein
7H	18654137	HORVU.MOREX.r3.7HG0644450	-	protein_coding	Coatomer subunit beta'-1
7H	18667527	HORVU.MOREX.r3.7HG0644460	+	protein_coding	Histone H3
7H	18692219	HORVU.MOREX.r3.7HG0644470	+	protein_coding	Histone H3
7H	18694630	HORVU.MOREX.r3.7HG0644480	+	protein_coding	Histone H1
7H	18698065	HORVU.MOREX.r3.7HG0644490	+	protein_coding	Serine/threonine-protein phosphatase 7 long form-like protein
7H	18717644	HORVU.MOREX.r3.7HG0644500	+	protein_coding	GAGA-binding transcriptional activator
7H	18718172	HORVU.MOREX.r3.7HG0644500	+	protein_coding	GAGA-binding transcriptional activator
7H	18740203	HORVU.MOREX.r3.7HG0644510	-	protein_coding	F-box domain containing protein
7H	18743570	HORVU.MOREX.r3.7HG0644520	+	protein_coding	Transposase
7H	18781461	HORVU.MOREX.r3.7HG0644530	-	protein_coding	Peptidyl-prolyl cis-trans isomerase
7H	18782686	HORVU.MOREX.r3.7HG0644540	-	protein_coding	1-aminocyclopropane-1-carboxylate synthase
7H	18816808	SNP2240
7H	18825410	HORVU.MOREX.r3.7HG0644550	+	protein_coding	B3 domain-containing protein
7H	18855295	HORVU.MOREX.r3.7HG0644560	+	protein_coding	Cell cycle regulated microtubule associated protein
7H	18867895	HORVU.MOREX.r3.7HG0644570	-	protein_coding	Receptor protein kinase
7H	18882545	HORVU.MOREX.r3.7HG0644580	+	protein_coding	Importin subunit alpha
7H	18929342	HORVU.MOREX.r3.7HG0644590	-	protein_coding	RNA helicase, ATP-dependent, SK12/DOB1 protein
7H	18930602	HORVU.MOREX.r3.7HG0644600	+	protein_coding	RNA-directed DNA polymerase (reverse transcriptase)-related family protein
7H	18933370	HORVU.MOREX.r3.7HG0644610	+	protein_coding	Pectinesterase
7H	18963950	HORVU.MOREX.r3.7HG0644620	-	protein_coding	NA
7H	19009976	HORVU.MOREX.r3.7HG0644630	-	protein_coding	Katanin p60 ATPase-containing subunit, putative
7H	19023265	HORVU.MOREX.r3.7HG0644640	+	non_coding	30S ribosomal protein S24e
7H	19051686	HORVU.MOREX.r3.7HG0644650	+	protein_coding	Flavin-containing monooxygenase
7H	19060061	HORVU.MOREX.r3.7HG0644660	-	protein_coding	DNA-(apurinic or apyrimidinic site) lyase
7H	19131637	HORVU.MOREX.r3.7HG0644670	-	protein_coding	Polynucleotidyl transferase, ribonuclease H-like superfamily protein
7H	19171172	HORVU.MOREX.r3.7HG0644680	-	protein_coding	Polynucleotidyl transferase, ribonuclease H-like superfamily protein
7H	19171638	HORVU.MOREX.r3.7HG0644690	+	protein_coding	Isocitrate lyase 2
7H	19213070	HORVU.MOREX.r3.7HG0644700	-	transposon_related	Retrotransposon protein, putative, unclassified
7H	19244623	HORVU.MOREX.r3.7HG0644710	+	protein_coding	Mutator-like transposase
7H	19246580	HORVU.MOREX.r3.7HG0644720	+	protein_coding	Mutator-like transposase
7H	19247119	HORVU.MOREX.r3.7HG0644730	+	protein_coding	Eukaryotic translation initiation factor 4 gamma 2
7H	19249594	HORVU.MOREX.r3.7HG0644740	-	protein_coding	Tripartite motif-containing protein 5
7H	19256871	HORVU.MOREX.r3.7HG0644750	+	transposon_related	Retrovirus-related Pol polyprotein from transposon TNT 1-94
7H	19257475	HORVU.MOREX.r3.7HG0644760	+	transposon_related	Retrovirus-related Pol polyprotein from transposon TNT 1-94
7H	19261589	HORVU.MOREX.r3.7HG0644770	+	protein_coding	S-adenosylmethionine:tRNA ribosyltransferase-isomerase
7H	19264578	HORVU.MOREX.r3.7HG0644780	-	protein_coding	Disease resistance protein RPM1	RPM1 ✔
7H	19283844	HORVU.MOREX.r3.7HG0644790	-	transposon_related	Retrovirus-related Pol polyprotein from transposon TNT 1-94
7H	19284569	HORVU.MOREX.r3.7HG0644800	-	transposon_related	Retrovirus-related Pol polyprotein from transposon TNT 1-94
7H	19297503	HORVU.MOREX.r3.7HG0644810	-	protein_coding	Disease resistance protein RPM1	RPM1 ✔
7H	19338333	HORVU.MOREX.r3.7HG0644820	-	protein_coding	Thionin
7H	19367230	HORVU.MOREX.r3.7HG0644830	+	protein_coding	Polyamine aminopropyltransferase
7H	19368821	HORVU.MOREX.r3.7HG0644840	+	transposon_related	Transposon protein, putative, CACTA, En/Spm sub-class
7H	19380911	HORVU.MOREX.r3.7HG0644850	-	protein_coding	Thionin
7H	19391086	HORVU.MOREX.r3.7HG0644860	-	protein_coding	Thionin
7H	19409072	HORVU.MOREX.r3.7HG0644870	-	protein_coding	Thionin
7H	19414301	HORVU.MOREX.r3.7HG0644880	-	protein_coding	Thionin
Green highlights represent plant disease resistance genes
Yellow highlights represent significant association loci
