# Supplementary material for: Screening of stable resistant accessions and identification of resistance loci to Barley yellow mosaic virus disease
Source: PeerJ. 2022 Mar 17;10:e13128. doi: 10.7717/peerj.13128 (PMC8934529; doi:10.7717/peerj.13128)
Supplement: Supplemental Information 8 [file peerj-10-13128-s008.xlsx]

## Sheet: Sheet1
Table S8 Distribution of disease resistance alleles at three novel loci the 181 barley accessions.
Summary
Environment		Yangzhou	Yancheng
Significantly associated SNP		SNP2571	SNP4036	SNP0024
Physical position		Che6H:557771117	Che5H:40265162	Che7H:18589900
Two-rowed	Cultivars/Breeding lines	33 (18.23%)	65 (35.91%)	31 (17.13%)
	Landrace	0 (0%)	1 (0.55%)	0 (0%)
Six-rowed	Cultivars/Breeding lines	8 (4.42%)	14 (7.73%)	3 (1.66%)
	Landrace	59 (32.60%)	50 (27.62%)	44 (24.31%)
Total		100 (55.25%)	130 (71.82%)	78 (43.09%)
Details, Green highlights represent disease resistant alleles
Nr.	Name of accessions	Row type	Marker significantly associated with barley yellow mosaic disease resistance
			Yangzhou		Yancheng
			Che6H:557771117	Phenotype	Che5H:40265162	Che7H:18589900	Phenotype
			SNP2571	YZ-BLUP	SNP4036	SNP0024	YC-BLUP
1	Sunong 22	Two	C	0.127571	G	G	0.212944
2	Zhenongda 7	Two	C	0.127571	G	G	0.23092
3	Sunong 91-712	Two	T	0.681317	G	A	0.284845
4	Yangnongpi 4	Two	T	0.539935	A	A	1.30045
5	Chuangdamai 3	Two	C	0.151134	G	G	0.1725
6	Yangnongpi 6	Two	T	0.245389	G	NA	0.235413
7	Sunong 16	Two	T	0.298407	G	A	0.576944
8	Huaai 11	Six	T	1.2763	A	NA	1.76331
9	Yunpi 1	Two	C	0.551717	A	A	1.68243
10	Yanyin 1	Two	T	0.881608	G	A	1.42178
11	Aigan 1	Two	NA	0.902227	G	NA	0.1725
12	32122	Two	T	1.13492	G	A	1.57457
13	Zheda 96-6	Two	C	0.566444	NA	G	1.1881
14	Pudamai 5	Two	T	1.10252	G	A	2.17225
15	Zhe 08-49	Six	T	1.17615	G	NA	1.54761
16	Edamai 6	Two	C	0.248335	G	A	0.248895
17	Zhu 05-043-2-1	Two	C	0.151134	G	G	0.815117
18	Sunong 6472	Two	T	1.24685	A	A	2.31156
19	Suyinmai 3	Two	T	1.04066	G	G	1.61502
20	2004-Riyin 1	Two	T	1.72401	A	A	2.46884
21	2004-Riyin 3	Two	T	1.54434	A	NA	2.40593
22	Nasonijo	Two	T	1.60325	A	A	2.37897
23	Yangpi 1	Two	T	0.327862	G	A	1.22855
24	Pudamai 9	Two	T	1.39117	G	NA	0.410673
25	Yangnongpi 8	Two	T	0.307244	G	G	0.608401
26	Harrinonijo	Two	NA	1.58263	A	A	2.01047
27	Zhexiu 12	Two	T	0.937572	G	G	1.1881
28	Youzhi 1	Two	C	0.159971	A	G	0.608401
29	Zhu 9505-1-3	Two	T	1.13786	G	A	1.65996
30	Supi 3	Two	C	0.631244	G	A	1.64198
31	91 Dan 2	Two	T	0.975863	A	A	1.51166
32	Shanxiliangzaoertiao	Two	T	1.70045	A	A	2.19472
33	Tongmai 10	Two	T	0.183535	G	A	0.585932
34	Yan 99175	Two	C	0.212989	G	A	0.41966
35	Yangsimai 1 × Jian 135	Two	C	0.805026	G	A	2.27561
36	Zhe 35-21	Two	C	0.145244	G	A	0.428648
37	Edamai 9706	Two	T	1.34994	G	A	1.69591
38	Zhu 06049-1	Two	T	0.51048	G	G	0.648845
39	Hua 11	Two	T	0.693099	G	G	1.13867
40	Hua 22	Two	T	0.451571	G	G	0.93645
41	Yangsimai 3	Two	C	0.12168	G	G	0.159018
42	Yangnongpi 7	Two	C	0.215935	G	G	0.460105
43	Suhua 2	Two	T	0.581171	G	G	0.41966
44	Harrington	Two	C	0.192371	G	G	0.428648
45	Zhu 96015-5-5	Two	C	0.136407	G	A	0.185981
46	Yuyaoxiangtian 2	Two	C	0.165862	G	G	0.585932
47	Pudamai 8	Two	C	0.858045	G	G	1.16564
48	7204	Two	T	0.595899	G	G	0.239907
49	Zhu 97022	Two	T	0.598844	G	G	0.545487
50	Rudong 6109	Two	C	0.383826	NA	NA	1.08475
51	Rudong 5218	Two	C	0.448626	NA	G	1.18361
52	Lian 9723	Two	T	1.66215	A	A	2.24865
53	Hong 07-456	Two	T	0.548771	G	A	1.42628
55	Zhepi 33	Two	T	0.613572	G	G	0.788154
56	Edamai 507	Two	T	1.23801	G	A	1.67793
57	Zhu2005-7-9	Two	T	1.23506	G	NA	1.56109
58	Yangsimai 1	Six	C	0.115789	G	G	0.185981
59	2004-Riyin 4	Six	C	0.127571	G	A	0.365734
61	Xinan 86-911	Two	T	1.37055	G	A	1.89813
62	Chuan 552209	Two	C	0.498699	G	NA	1.01734
63	Yangyin 02	Two	C	0.392662	NA	A	0.981388
64	Yanyin 1 × Zhenongda 3	Two	T	0.248335	G	A	1.56109
65	QS	Two	C	0.684263	G	A	1.27349
66	Zhu 3	Two	T	1.24685	G	NA	1.71388
67	Zhu 7	Two	T	1.05539	NA	G	0.78366
68	2004-Riyin 2	Six	C	0.124625	G	A	0.194969
69	Zhouxuan 1	Two	C	0.401498	G	G	1.01285
70	Hong 09-784	Two	T	1.88896	A	G	2.32504
71	Zhu 4	Six	T	1.63859	G	A	1.13867
72	Huadamai 5	Two	T	1.81237	G	A	2.07788
73	Yunpi 2	Two	T	1.23801	A	A	2.6441
74	Yunpi 3	Two	T	1.46775	A	A	2.10934
75	Yunpi 4	Two	T	1.21739	G	A	1.5566
76	Yunpi 5	Two	T	1.16437	A	A	2.28909
77	Yunpi 6	Two	T	0.981754	G	NA	2.27112
78	Yang 95168×Yan 94130	Two	T	0.12168	G	A	0.32529
79	Hu 01-2946	Two	C	0.106953	G	G	0.558969
80	Yunpi 7	Two	T	1.60619	A	A	2.19023
81	Yunpi 9	Two	T	1.93314	A	A	1.93408
82	Fawaweite	Two	T	1.58557	G	G	1.87566
83	Zhu 5	Two	C	0.834481	G	A	2.31156
84	Hua 2328	Two	T	1.34405	G	A	1.96104
85	Mei97-1455	Two	T	1.45597	G	A	1.93857
86	Mei 97-1338	Six	T	1.11135	G	A	1.56559
87	Zhu 6	Two	T	1.23212	G	A	1.58356
88	Huadamai 6	Two	T	1.45008	G	A	1.80825
89	Huadamai 7	Two	T	1.92725	G	A	1.9161
90	CM72	Six	T	1.98616	G	A	1.87566
91	Gairdner	Two	T	1.2763	G	A	0.922969
92	Frankin	Two	T	1.76525	A	A	2.02396
93	T98189	Two	T	1.67394	A	A	2.04643
94	Suyin 27	Two	T	0.822699	G	NA	1.27798
95	AcBacclm	Six	T	1.62975	G	A	1.82623
96	AcBurman	Six	T	1.57674	G	A	1.63749
97	OR71	Six	NA	0.460408	G	A	1.1162
98	C2118	Six	T	1.65626	G	A	1.92959
99	Dazhong 8891	Six	C	0.142298	G	G	0.275858
100	Yangnongpi 5	Two	C	0.148189	NA	NA	0.185981
101	Yangnongpi 9	Two	C	0.204153	G	A	0.284845
102	Yangnongpi 10	Two	C	0.215935	NA	NA	0.756697
104	Yangnongpi 11	Two	C	0.112844	G	G	0.280352
105	Yangnongpi 12	Two	C	0.133462	G	G	0.271364
106	Huangchangmang	Two	T	1.36466	G	A	1.6285
107	Hu 1154	Two	C	0.12168	G	G	0.657833
108	Yang 0187	Two	C	0.127571	NA	NA	0.221932
109	1430R	Two	T	0.822699	NA	A	1.73635
110	Taixin 9425	Two	T	1.15259	G	G	1.52065
111	Ganken 5	Six	C	0.819754	A	A	1.57457
112	Shijiazhuangdamai	Six	C	1.22034	G	A	1.70939
113	Ningjingdamai	Six	C	1.7623	G	A	1.96104
114	Yixiandamai	Six	C	1.78586	NA	NA	2.14529
115	80-229 Damai	Six	C	0.56939	NA	G	0.734228
116	Weixianchundamai	Six	C	1.11725	NA	G	0.896006
117	Layiba	Six	C	0.916954	G	G	1.20159
118	Jinancaodamai	Six	C	1.68572	G	NA	1.86218
119	Luodamai	Six	C	0.987645	G	A	0.981388
120	Manghuomai	Six	C	1.17321	G	G	1.23304
121	Huodengmang	Six	C	1.15848	G	NA	1.53862
122	Maodamai	Six	C	1.41179	G	NA	1.15215
123	Changmangdamai	Six	C	0.95819	G	G	1.13418
124	Mangdamai	Six	C	0.955245	G	G	1.6285
125	Mangdamai	Six	C	1.24979	G	G	1.21057
126	Silengmangdamai	Six	C	0.433899	NA	NA	0.743216
127	Damai	Six	C	0.286626	G	G	0.343265
128	Tangtoufa	Six	NA	1.02004	G	G	0.869043
129	Youzidamai	Six	C	1.21445	G	NA	1.08475
130	Damai	Six	C	1.03183	G	G	1.39033
131	Sanyuehuang	Six	C	1.59146	NA	A	1.81275
132	Luodamai	Six	C	1.22034	G	NA	1.34539
133	Duanmangdamai	Six	C	1.13492	G	G	1.31843
134	Silengdamai	Six	C	0.681317	G	G	1.16114
135	Changsuidamai	Six	C	0.268953	G	NA	0.824105
136	Liulengdamai	Six	NA	0.993536	G	G	1.37235
137	Tuheshanglurendamai	Six	C	0.69899	G	G	1.17013
138	Midamai	Six	C	1.16143	NA	A	1.21507
139	Duanmangdamai	Six	C	0.875717	NA	G	1.57907
140	Laolaichuang	Six	C	1.39117	G	G	1.37685
141	58--40	Six	C	0.489862	NA	NA	0.293833
142	Zisilengdamai	Six	C	0.631244	G	G	0.455611
143	Jiangning 1395	Six	C	0.760844	G	G	0.963413
144	Yangzhoubaimai	Six	C	0.416226	G	G	0.648845
145	Sanyuehuang	Six	C	0.313135	G	G	0.473586
146	Liulengdamai	Six	C	0.112844	G	G	0.203957
147	Yuexisanyuehuang	Six	C	0.539935	G	G	0.334277
148	Qimendamai	Six	C	1.13492	NA	A	1.47571
149	Jingxianluanqiangzi	Six	NA	0.905172	NA	NA	1.15665
150	Ximai	Six	C	0.145244	G	G	0.253389
151	Bianzicaoda	Six	NA	0.127571	NA	G	0.1725
152	Liudanzhun	Six	C	0.112844	G	G	0.415166
154	Wudamai	Six	C	1.19383	G	G	1.4847
155	Qingke	Six	C	0.333753	G	G	0.217438
156	Pidamai	Six	NA	0.95819	NA	NA	1.5521
157	Huwupidamai	Six	C	1.36466	G	G	1.44875
158	Damai	Six	C	1.5355	NA	NA	1.39931
159	Hongmangdamai	Six	C	1.44419	G	G	1.47571
160	Baidamai	Six	T	1.23801	NA	G	1.30944
161	Yangdamai	Six	C	1.01121	G	G	1.4847
162	Yangdamai	Six	C	1.14965	G	NA	1.82173
163	Changmangluodamai	Six	C	1.28219	G	G	1.51615
164	Siyuehuang	Six	C	0.807972	G	G	1.56109
165	Zhuchengmidamai	Six	C	0.572335	NA	G	0.765685
166	Maodamai	Six	C	0.813863	G	G	0.837586
167	Hongkedamai	Six	C	0.386771	NA	G	1.07126
168	Wumimai	Six	C	1.04655	G	G	1.57457
169	Damai	Six	NA	1.1467	G	NA	1.94307
170	Quzhoudamai	Six	T	1.74168	G	A	2.32954
171	Changyangmimai	Six	NA	1.74757	G	A	1.81724
172	Xiaoguangchundamai	Six	C	1.58852	NA	NA	1.79926
174	Guangtoudamai	Six	C	0.987645	NA	G	1.79926
175	Damai	Six	C	1.14375	G	G	1.96554
176	Hezhanglaomai	Six	C	1.52372	G	G	1.98801
177	Midamai	Six	C	1.40885	NA	A	1.99699
178	Toudenglaomai	Six	C	1.12314	G	G	1.3364
179	Sansuilaomai	Six	C	1.31459	G	G	1.91161
180	Maotoudamai	Six	NA	1.42357	NA	NA	1.63299
181	Hongsuimai	Six	C	1.24979	G	NA	1.15665
182	Luomai	Six	C	1.59441	G	A	2.15877
183	Liulengmai	Six	C	1.34699	G	G	2.1408
184	Laomai	Six	C	1.03183	G	G	1.71838
185	Zang	Six	C	1.73874	G	NA	1.44875
186	Zhongpin 1066	Six	T	1.44714	A	G	2.01047
